# Supplementary material for: Removal Performance and Mechanism of Benzo(b)Fluorathene Using MnO2 Nanoflower/Graphene Oxide Composites
Source: MDPI journal article supplement (doi:10.3390/ma14164402), 2021-08-06
Supplement: s1 [file s1]

# Removal Performance and Mechanism of Benzo[b]Fluorathene Using MnO<sub>2</sub> Nanoflower/Graphene Oxide Composites

Qingqing Cao <sup>1</sup>, Siqi Lu <sup>2</sup>, Wenjun Yin <sup>1,2,\*</sup>, Yan Kang <sup>3</sup>, Naihao Yang <sup>4</sup>, Yudong Hou <sup>5</sup> and Zizhang Guo <sup>6,\*</sup>

<sup>1</sup> School of Architecture and Urban Planning, Shandong Jianzhu University, Jinan 250014, China; caoqingqing18@sdjzu.edu.cn

<sup>2</sup> College of Environmental Science and Engineering, Tongji University, Shanghai 200092, China; 1851284@tongji.edu.cn

<sup>3</sup> College of Environment and Safety Engineering, Qingdao University of Science and Technology, Qingdao 266042, China; kangyan@qust.edu.cn

<sup>4</sup> Jinan Engineering Consulting Institute, Jinan 250014, China; qdhfx.238@163.com

<sup>5</sup> Majian International Architectural Design Consulting Co. LTD, Jinan 250014, China; hou.yu.dong@163.com

<sup>6</sup> Shandong Key Laboratory of Water Pollution Control and Resource Reuse, School of Environmental Science and Engineering, Shandong University, Qingdao 266237, China

\* Correspondence: yinwenjun1991@163.com (W.Y.); guozizhang@sdu.edu.cn (Z.G.)

## Text S1:

Natural graphite powder (100 mesh, Alfa Aesar) was used to synthesize graphene oxide based on a modified Hummers' method. <sup>1</sup> Briefly, graphite powder (0.5 g) and sodium nitrate (0.5 g) were first mixed with sulfuric acid (23 mL, 98%) at 0 °C followed by slow addition of 3 g potassium permanganate with constant stirring. Then, the mixture was kept at 35 °C for 1 h in a thermostat water bath. After that, the suspension was mixed with 40 mL deionized water and heated at 90 °C for 30 min. Subsequently, deionized water (100 mL) and hydrogen peroxide (5 mL, 30%) were added to terminate the reaction. Finally, the precipitate was separated by centrifugation at 5000 rpm for 15 min and washed with deionized water to neutral and dried at 60 °C for 12 h to get prepared graphene oxide (GO) for further use.

## Text S2:

The morphology of as-prepared MnO<sub>2</sub> NF and MnO<sub>2</sub> NF/GO composite were observed by field emission scanning electron microscopy (JEOL 7800 FESEM/SEM, Freising, Germany) and microstructures were identified by high-resolution transmission electron microscopy (HRTEM, Zeiss Libra 200, Tokyo, Japan). <sup>2,4</sup> The HAADF (High-Angle Annular Dark Field)-STEM, elemental mapping, and EDX of composites were carried out using a Tecnai G2 F20 instrument at an accelerating voltage of 200 kV (Hillsboro, OR, USA). The crystallographic structure of as-synthesized powders was determined by X-ray diffraction (XRD, D/max-1200X, Cu K $\alpha$  radiation ( $\lambda = 1.5406 \text{ \AA}$ ) operating at 30 kV and 100 mA). The textural parameters including specific surface area, total pore volume, and N<sub>2</sub> adsorption/desorption isotherms were determined by Brunauer-Emmett-Teller (BET) (Quanta Chrome Corporation, Boynton Beach, FL, USA). The surface chemical properties (elemental composition and electronic valence) were investigated by X-ray photoelectron spectroscopy (XPS, Nico-let-460, Thermo Fisher, Zagreb, Croatia) and XPS data corresponding to C 1s, O 1s, and Mn 2p spectra were fitted using the software CasaXPS.

**Citation:** Cao, Q.; Lu, S.; Yin, W.; Kang, Y.; Yang, N.; Hou, Y.; Guo, Z. Removal Performance and Mechanism of Benzo[b]Fluorathene Using MnO<sub>2</sub> Nanoflower/Graphene Oxide Composites. *Materials* **2021**, *14*, 4402. <https://doi.org/10.3390/ma14164402>  
Academic Editor(s): Avelino Núñez-Delgado

Received: 10 June 2021

Accepted: 2 August 2021

Published: 6 August 2021

**Publisher's Note:** MDPI stays neutral with regard to jurisdictional claims in published maps and institutional affiliations.

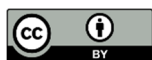

**Copyright:** © 2021 by the authors. Licensee MDPI, Basel, Switzerland. This article is an open access article distributed under the terms and conditions of the Creative Commons Attribution (CC BY) license (<http://creativecommons.org/licenses/by/4.0/>).

**Table S1.** Shimadzu GCMS-QP 2010 method parameters for BbF concentration determination.

|    |                               |                                    |                        |
|----|-------------------------------|------------------------------------|------------------------|
| GC | Inlet temperature             | 250 °C                             |                        |
|    | Sampling method               | Unsplit stream sampling            |                        |
|    | Sample size                   | 2.0 µL                             |                        |
|    | Carrier gas                   | He, 1.5 mL/min                     |                        |
|    | Temperature programming       | Initial column temperature         | 60 °C, held for 5 min  |
|    |                               | Final column temperature           | 290 °C, held for 2 min |
|    |                               | Heating rate                       | 10°C/min               |
| MS | Retention time                | 35 min                             |                        |
|    | Ion source                    | EI                                 |                        |
|    | Ion source temperature        | 225 °C                             |                        |
|    | Ionization Energy             | 70 eV                              |                        |
|    | Data acquisition and analysis | SIM (selected ion monitoring) mode |                        |
|    | Transfer line temperature     | 280 °C                             |                        |
|    | Electron multiplier voltage   | Consistent with a tuning voltage   |                        |

BbF-d12 standard (1000 mg/L, dissolved in CH<sub>2</sub>Cl<sub>2</sub>), Custom Semivolatile Mix of 2-Fluorobiphenyl, and P-Terphenyl-d14 (2000 mg/L, dissolved in acetone-hexane 1:1) used for the preparation of GC-MS samples were purchased from o2si smart solutions (made in the Shimadzu, USA).

## References:

1. Hummers Jr, W.S.; Offeman, R.E., Preparation of graphitic oxide. *Journal of the american chemical society* **1958**, *80* (6), 1339-1339.
2. M. Xiang, O. Aguerre-Chariol, M. Morgeneyer, F. Philippe, Y. Liu, C. Bressot, Uncertainty assessment for the airborne nanoparticle collection efficiency of a TEM grid-equipped sampling system by Monte-Carlo calculation, *Advanced Powder Technology*, (2021).
3. M. Xiang, M. Morgeneyer, F. Philippe, M. Manokaran, C. Bressot, Comparative review of efficiency analysis for airborne solid submicrometer particle sampling by nuclepore filters, *Chemical Engineering Research and Design*, **164** (2020) 338-351.
4. M. Xiang, M. Morgeneyer, O. Aguerre-Chariol, F. Philippe, C. Bressot, Airborne nanoparticle collection efficiency of a TEM grid-equipped sampling system, *Aerosol Science and Technology*, (2021) 1-19.
